# Supplementary material
Source: publisher figshare collection journal article supplement (https://sage.figshare.com/ndownloader/files/22366023)
Supplement: Supplementary file 1 [file 22366023]

**Appendix 1. Coding definitions (ICD-10) for 30 conditions included in Tonelli et al. (2015)**

| <b>Morbidity</b>                | <b>ICD-10 codes</b>                                                                                                                                                                                                                                                                                                      | <b>Description</b>                                                                                                                                                                                                                                                                                                                                                                                                                                                                                                                                                                                                                                                                                                                                                                                                                                                                                                                                                                                                                                                                                                                                    | <b>Prevalence (%)</b> |
|---------------------------------|--------------------------------------------------------------------------------------------------------------------------------------------------------------------------------------------------------------------------------------------------------------------------------------------------------------------------|-------------------------------------------------------------------------------------------------------------------------------------------------------------------------------------------------------------------------------------------------------------------------------------------------------------------------------------------------------------------------------------------------------------------------------------------------------------------------------------------------------------------------------------------------------------------------------------------------------------------------------------------------------------------------------------------------------------------------------------------------------------------------------------------------------------------------------------------------------------------------------------------------------------------------------------------------------------------------------------------------------------------------------------------------------------------------------------------------------------------------------------------------------|-----------------------|
| Hypertension                    | I10<br>I11<br>I12<br>I13<br>I15                                                                                                                                                                                                                                                                                          | Essential (primary) hypertension<br>Hypertensive heart disease<br>Hypertensive renal disease<br>Hypertensive heart and renal disease<br>Secondary hypertension                                                                                                                                                                                                                                                                                                                                                                                                                                                                                                                                                                                                                                                                                                                                                                                                                                                                                                                                                                                        | 19.0                  |
| Diabetes                        | E10<br>E11<br>E12<br>E13<br>E14                                                                                                                                                                                                                                                                                          | Insulin-dependent diabetes mellitus<br>Non-insulin-dependent diabetes mellitus<br>Malnutrition-related diabetes mellitus<br>Other specified diabetes mellitus<br>Unspecified diabetes mellitus                                                                                                                                                                                                                                                                                                                                                                                                                                                                                                                                                                                                                                                                                                                                                                                                                                                                                                                                                        | 8.4                   |
| Chronic kidney disease          | N00-N23                                                                                                                                                                                                                                                                                                                  | Glomerular diseases (N00-N08)<br>Renal tubulo-interstitial diseases (N10-N16)<br>Renal failure (N17-N19)<br>Urolithiasis (N20-N23)                                                                                                                                                                                                                                                                                                                                                                                                                                                                                                                                                                                                                                                                                                                                                                                                                                                                                                                                                                                                                    | 8.2                   |
| Asthma                          | J45                                                                                                                                                                                                                                                                                                                      | Asthma                                                                                                                                                                                                                                                                                                                                                                                                                                                                                                                                                                                                                                                                                                                                                                                                                                                                                                                                                                                                                                                                                                                                                | 6.7                   |
| Atrial fibrillation and flutter | I48                                                                                                                                                                                                                                                                                                                      | Atrial fibrillation and flutter                                                                                                                                                                                                                                                                                                                                                                                                                                                                                                                                                                                                                                                                                                                                                                                                                                                                                                                                                                                                                                                                                                                       | 6.1                   |
| Chronic pain                    | F45.4<br>M08.1<br>M25.5<br>M43.2<br>M43.3<br>M43.4<br>M43.5<br>M43.6<br>M45<br>M46.1<br>M46.3<br>M46.4<br>M46.9<br>M47<br>M48.0<br>M48.1<br>M48.8<br>M48.9<br>M50.8<br>M50.9<br>M51<br>M53.1<br>M53.2<br>M53.3<br>M53.8<br>M53.9<br>M54<br>M60.8<br>M60.9<br>M63.3<br>M79.0<br>M79.1<br>M79.2<br>M79.6<br>M79.7<br>M96.1 | Persistent somatoform pain disorder<br>Juvenile ankylosing spondylitis<br>Pain in joint<br>Other fusion of spine<br>Recurrent atlantoaxial subluxation with myelopathy<br>Other recurrent atlantoaxial subluxation<br>Other recurrent vertebral subluxation<br>Torticollis<br>Ankylosing spondylitis<br>Sacroiliitis, not elsewhere classified<br>Infection of intervertebral disc (pyogenic)<br>Discitis, unspecified<br>Inflammatory spondylopathy, unspecified<br>Spondylosis<br>Spinal stenosis<br>Ankylosing hyperostosis [Forestier]<br>Other specified spondylopathies<br>Spondylopathy, unspecified<br>Other cervical disc disorders<br>Cervical disc disorder, unspecified<br>Other intervertebral disc disorders<br>Cervicobrachial syndrome<br>Spinal instabilities<br>Sacrococcygeal disorders, not elsewhere classified<br>Other specified dorsopathies<br>Dorsopathy, unspecified<br>Dorsalgia<br>Other myositis<br>Myositis, unspecified<br>Myositis in sarcoidosis<br>Rheumatism, unspecified<br>Myalgia<br>Neuralgia and neuritis, unspecified<br>Pain in limb<br>Fibromyalgia<br>Postlaminectomy syndrome, not elsewhere classified | 6.1                   |

| Morbidity                                                             | ICD-10 codes                                                                                                                                               | Description                                                                                                                                                                                                                                                                                                                                                                                                                                                                                                                                                                                                                                                                                                                                                                                                                                                                                  | Prevalence (%) |
|-----------------------------------------------------------------------|------------------------------------------------------------------------------------------------------------------------------------------------------------|----------------------------------------------------------------------------------------------------------------------------------------------------------------------------------------------------------------------------------------------------------------------------------------------------------------------------------------------------------------------------------------------------------------------------------------------------------------------------------------------------------------------------------------------------------------------------------------------------------------------------------------------------------------------------------------------------------------------------------------------------------------------------------------------------------------------------------------------------------------------------------------------|----------------|
| Chronic pulmonary disease (excludes asthma)                           | I27.8<br>I27.9<br>J40<br>J41<br>J42<br>J43<br>J44<br>J46<br>J47<br>J60<br>J61<br>J62<br>J63<br>J64<br>J65<br>J66<br>J67<br>J68.4<br>J70.1<br>J70.3         | Other specified pulmonary heart diseases<br>Pulmonary heart disease, unspecified<br>Bronchitis, not specified as acute or chronic<br>Simple and mucopurulent chronic bronchitis<br>Unspecified chronic bronchitis<br>Emphysema<br>Other chronic obstructive pulmonary disease<br>Status asthmaticus<br>Bronchiectasis<br>Coalworker pneumoconiosis<br>Pneumoconiosis due to asbestos and other mineral fibres<br>Pneumoconiosis due to dust containing silica<br>Pneumoconiosis due to other inorganic dusts<br>Unspecified pneumoconiosis<br>Pneumoconiosis associated with tuberculosis<br>Airway disease due to specific organic dust<br>Hypersensitivity pneumonitis due to organic dust<br>Chronic respiratory conditions due to chemicals, gases, fumes and vapours<br>Chronic and other pulmonary manifestations due to radiation<br>Chronic drug-induced interstitial lung disorders | 5.9            |
| Hypothyroidism                                                        | E00<br>E01<br>E02<br>E03<br>E89.0                                                                                                                          | Congenital iodine-deficiency syndrome<br>Iodine-deficiency-related thyroid disorders and allied conditions<br>Subclinical iodine-deficiency hypothyroidism<br>Other hypothyroidism<br>Postprocedural hypothyroidism                                                                                                                                                                                                                                                                                                                                                                                                                                                                                                                                                                                                                                                                          | 4.5            |
| Cancer, non-metastatic (breast, cervical, colorectal, lung, prostate) | C18<br>C19<br>C20<br>C21<br>C33<br>C34<br>C38.4<br>C45.0<br>C46.7<br>C50<br>C53<br>C61<br>D01.0<br>D01.1<br>D01.2<br>D01.3<br>D02.2<br>D05<br>D06<br>D07.5 | Malignant neoplasm of colon<br>Malignant neoplasm of rectosigmoid junction<br>Malignant neoplasm of rectum<br>Malignant neoplasm of anus and anal canal<br>Malignant neoplasm of trachea<br>Malignant neoplasm of bronchus and lung<br>Pleura<br>Mesothelioma of pleura<br>Kaposi sarcoma of other sites<br>Malignant neoplasm of breast<br>Malignant neoplasm of cervix uteri<br>Malignant neoplasm of prostate<br>Carcinoma in situ of Colon<br>Carcinoma in situ of Rectosigmoid junction<br>Carcinoma in situ of Rectum<br>Carcinoma in situ of Anus and anal canal<br>Carcinoma in situ of Bronchus and lung<br>Carcinoma in situ of breast<br>Carcinoma in situ of cervix uteri<br>Carcinoma in situ of Prostate                                                                                                                                                                       | 4.2            |
| Alcohol misuse                                                        | E52<br>F10<br>G62.1<br>I42.6                                                                                                                               | Niacin deficiency<br>Mental and behavioural disorders due to use of alcohol<br>Alcoholic polyneuropathy<br>Alcoholic cardiomyopathy                                                                                                                                                                                                                                                                                                                                                                                                                                                                                                                                                                                                                                                                                                                                                          | 4.1            |

| Morbidity                            | ICD-10 codes                                                                            | Description                                                                                                                                                                                                                                                                                                                                                                                                                                           | Prevalence (%) |
|--------------------------------------|-----------------------------------------------------------------------------------------|-------------------------------------------------------------------------------------------------------------------------------------------------------------------------------------------------------------------------------------------------------------------------------------------------------------------------------------------------------------------------------------------------------------------------------------------------------|----------------|
|                                      | K29.2<br>K70.0<br>K70.3<br>K70.9<br>T51<br>Z50.2<br>Z71.4<br>Z72.1                      | Alcoholic gastritis<br>Alcoholic fatty liver<br>Alcoholic cirrhosis of liver<br>Alcoholic liver disease, unspecified<br>Toxic effect of alcohol<br>Alcohol rehabilitation<br>Alcohol abuse counselling and surveillance<br>Alcohol use                                                                                                                                                                                                                |                |
| Chronic heart failure                | I09.9<br>I25.5<br>I42.0<br>I42.5<br>I42.6<br>I42.7<br>I42.8<br>I42.9<br>I43<br>I50      | Rheumatic heart disease, unspecified<br>Ischaemic cardiomyopathy<br>Dilated cardiomyopathy<br>Other restrictive cardiomyopathy<br>Alcoholic cardiomyopathy<br>Cardiomyopathy due to drugs and other external agents<br>Other cardiomyopathies<br>Cardiomyopathy, unspecified<br>Cardiomyopathy in diseases classified elsewhere<br>Heart failure                                                                                                      | 3.8            |
| Severe constipation                  | K55.8<br>K56.0<br>K56.4<br>K56.7<br>K59.0<br>K63.1<br>K63.4<br>K63.8<br>K92.8           | Other vascular disorders of intestine<br>Paralytic ileus<br>Other impaction of intestine<br>Ileus, unspecified<br>Constipation<br>Perforation of intestine (nontraumatic)<br>Enteroptosis<br>Other specified diseases of intestine<br>Other specified diseases of digestive system                                                                                                                                                                    | 3.3            |
| Myocardial infarction                | I21<br>I22                                                                              | Acute myocardial infarction<br>Subsequent myocardial infarction                                                                                                                                                                                                                                                                                                                                                                                       | 2.3            |
| Depression                           | F20.4<br>F31.3<br>F31.4<br>F31.5<br>F32<br>F33<br>F34.1<br>F41.2<br>F43.2               | Post-schizophrenic depression<br>Bipolar affective disorder, current episode mild or moderate depression<br>Bipolar affective disorder, current episode severe depression without psychotic symptoms<br>Bipolar affective disorder, current episode severe depression with psychotic symptoms<br>Depressive episode<br>Recurrent depressive disorder<br>Dysthymia<br>Mixed anxiety and depressive disorder<br>Adjustment disorders                    | 2.3            |
| Stroke or transient ischaemic attack | G45.0<br>G45.1<br>G45.2<br>G45.3<br>G45.8<br>G45.9<br>H34.1<br>I60<br>I61<br>I63<br>I64 | Vertebro-basilar artery syndrome<br>Carotid artery syndrome (hemispheric)<br>Multiple and bilateral precerebral artery syndromes<br>Amaurosis fugax<br>Other transient cerebral ischaemic attacks and related syndromes<br>Transient cerebral ischaemic attack, unspecified<br>Central retinal artery occlusion<br>Subarachnoid haemorrhage<br>Intracerebral haemorrhage<br>Cerebral infarction<br>Stroke, not specified as haemorrhage or infarction | 2.0            |

| Morbidity                            | ICD-10 codes                                                                                                                                                                                   | Description                                                                                                                                                                                                                                                                                                                                                                                                                                                                                                                                                                                                                                                                                                                                                                | Prevalence (%) |
|--------------------------------------|------------------------------------------------------------------------------------------------------------------------------------------------------------------------------------------------|----------------------------------------------------------------------------------------------------------------------------------------------------------------------------------------------------------------------------------------------------------------------------------------------------------------------------------------------------------------------------------------------------------------------------------------------------------------------------------------------------------------------------------------------------------------------------------------------------------------------------------------------------------------------------------------------------------------------------------------------------------------------------|----------------|
| Cancer, metastatic                   | C77<br>C78<br>C79<br>C80                                                                                                                                                                       | Secondary and unspecified malignant neoplasm of lymph nodes<br>Secondary malignant neoplasm of respiratory and digestive organs<br>Secondary malignant neoplasm of other and unspecified sites<br>Malignant neoplasm, without specification of site                                                                                                                                                                                                                                                                                                                                                                                                                                                                                                                        | 1.8            |
| Dementia                             | F00<br>F01<br>F02<br>F03<br>F05.1<br>G30<br>G31.1                                                                                                                                              | Dementia in Alzheimer disease<br>Vascular dementia<br>Dementia in other diseases classified elsewhere<br>Unspecified dementia<br>Delirium superimposed on dementia<br>Alzheimer disease<br>Senile degeneration of brain, not elsewhere classified                                                                                                                                                                                                                                                                                                                                                                                                                                                                                                                          | 1.7            |
| Rheumatoid arthritis                 | M05<br>M06<br>M31.5<br>M32<br>M33<br>M34<br>M35.1<br>M35.3<br>M36.0                                                                                                                            | Seropositive rheumatoid arthritis<br>Other rheumatoid arthritis<br>Giant cell arteritis with polymyalgia rheumatica<br>Systemic lupus erythematosus<br>Dermatopolymyositis<br>Systemic sclerosis<br>Other overlap syndromes<br>Polymyalgia rheumatica<br>Dermato(poly)myositis in neoplastic disease                                                                                                                                                                                                                                                                                                                                                                                                                                                                       | 1.7            |
| Epilepsy                             | G40<br>G41                                                                                                                                                                                     | Epilepsy<br>Status epilepticus                                                                                                                                                                                                                                                                                                                                                                                                                                                                                                                                                                                                                                                                                                                                             | 1.4            |
| Inflammatory bowel disease           | K50<br>K51                                                                                                                                                                                     | Crohn disease [regional enteritis]<br>Ulcerative colitis                                                                                                                                                                                                                                                                                                                                                                                                                                                                                                                                                                                                                                                                                                                   | 1.4            |
| Cirrhosis and hepatic decompensation | K70.3<br>K74.3<br>K74.4<br>K74.5<br>K74.6<br>I85.0<br>I85.9<br>I98.2<br><br>I98.3<br><br>K65.0<br>K65.8<br>K65.9<br>K67.0<br>K67.1<br>K67.2<br>K67.3<br>K67.8<br><br>K76.7<br>K93.0<br><br>R18 | Alcoholic cirrhosis of liver<br>Primary biliary cirrhosis<br>Secondary biliary cirrhosis<br>Biliary cirrhosis, unspecified<br>Other and unspecified cirrhosis of liver<br>Oesophageal varices with bleeding<br>Oesophageal varices without bleeding<br>Oesophageal varices without bleeding in diseases classified elsewhere<br>Oesophageal varices with bleeding in diseases classified elsewhere<br>Acute peritonitis<br>Other peritonitis<br>Peritonitis, unspecified<br>Chlamydial peritonitis<br>Gonococcal peritonitis<br>Syphilitic peritonitis<br>Tuberculous peritonitis<br>Other disorders of peritoneum in infectious diseases classified elsewhere<br>Hepatorenal syndrome<br>Tuberculous disorders of intestines, peritoneum and mesenteric glands<br>Ascites | 1.1            |
| Cancer, lymphoma                     | C81<br>C82<br>C83<br>C84                                                                                                                                                                       | Hodgkin lymphoma<br>Follicular lymphoma<br>Non-follicular lymphoma<br>Mature T/NK-cell lymphomas                                                                                                                                                                                                                                                                                                                                                                                                                                                                                                                                                                                                                                                                           | 0.6            |

| Morbidity                                | ICD-10 codes                                                         | Description                                                                                                                                                                                                                                                                                                                                                                                                                                                                                                                                                                                                                                          | Prevalence (%) |
|------------------------------------------|----------------------------------------------------------------------|------------------------------------------------------------------------------------------------------------------------------------------------------------------------------------------------------------------------------------------------------------------------------------------------------------------------------------------------------------------------------------------------------------------------------------------------------------------------------------------------------------------------------------------------------------------------------------------------------------------------------------------------------|----------------|
|                                          | C85<br>C88<br>C90.0<br>C90.2<br>C96                                  | Other and unspecified types of non-Hodgkin lymphoma<br>Malignant immunoproliferative diseases<br>Multiple myeloma<br>Extramedullary plasmacytoma<br>Other leukaemias of specified cell type                                                                                                                                                                                                                                                                                                                                                                                                                                                          |                |
| Peptic ulcer disease without haemorrhage | K25.7<br>K25.9<br>K26.7<br>K26.9<br>K27.7<br>K27.9<br>K28.7<br>K28.9 | Gastric ulcer-Chronic without haemorrhage or perforation<br>Gastric ulcer-Unspecified as acute or chronic, without haemorrhage or perforation<br>Duodenal ulcer-Chronic without haemorrhage or perforation<br>Duodenal ulcer-Unspecified as acute or chronic, without haemorrhage or perforation<br>Peptic ulcer, site unspecified- Chronic without haemorrhage or perforation<br>Peptic ulcer, site unspecified- Unspecified as acute or chronic, without haemorrhage or perforation<br>Gastrojejunal ulcer- Chronic without haemorrhage or perforation<br>Gastrojejunal ulcer- Unspecified as acute or chronic, without haemorrhage or perforation | 0.6            |
| Irritable bowel syndrome                 | K58                                                                  | Irritable bowel syndrome                                                                                                                                                                                                                                                                                                                                                                                                                                                                                                                                                                                                                             | 0.5            |
| Multiple sclerosis                       | G35<br>G36<br>G37<br>H46                                             | Multiple sclerosis<br>Other acute disseminated demyelination<br>Other demyelinating diseases of central nervous system<br>Optic neuritis                                                                                                                                                                                                                                                                                                                                                                                                                                                                                                             | 0.5            |
| Parkinson's disease                      | G20<br>G21<br>G22                                                    | Parkinson disease<br>Secondary parkinsonism<br>Parkinsonism in diseases classified elsewhere                                                                                                                                                                                                                                                                                                                                                                                                                                                                                                                                                         | 0.5            |
| Schizophrenia                            | F20<br>F21<br>F23.2<br>F25                                           | Schizophrenia<br>Schizotypal disorder<br>Acute schizophrenia-like psychotic disorder<br>Schizoaffective disorders                                                                                                                                                                                                                                                                                                                                                                                                                                                                                                                                    | 0.3            |
| Psoriasis                                | L40.0<br>L40.1<br>L40.2<br>L40.3<br>L40.4<br>L40.8<br>L40.9          | Psoriasis vulgaris<br>Generalized pustular psoriasis<br>Acrodermatitis continua<br>Pustulosis palmaris et plantaris<br>Guttate psoriasis<br>Other psoriasis<br>Psoriasis, unspecified                                                                                                                                                                                                                                                                                                                                                                                                                                                                | 0.2            |
| Peripheral vascular disease              | I70.2                                                                | Atherosclerosis of arteries of extremities                                                                                                                                                                                                                                                                                                                                                                                                                                                                                                                                                                                                           | 0.1            |
| Chronic viral hepatitis B                | B16<br>B18.0<br>B18.1                                                | Acute hepatitis B<br>Chronic viral hepatitis B with delta-agent<br>Chronic viral hepatitis B without delta-agent                                                                                                                                                                                                                                                                                                                                                                                                                                                                                                                                     | 0.0            |

Note: Minor changes to the Tonelli et al. (2015) published algorithms were made. The algorithms developed by Tonelli required a combination of hospitalization, claims and outpatient codes over varying time periods. We modified this to at least one hospitalisation in the five years prior to index for all morbidities. For identifying chronic kidney disease, Tonelli supplemented the algorithm using lab data, however we only used administrative data. The codes for "peptic ulcer disease" referred to "peptic ulcer disease without haemorrhage or perforation", therefore we amended the morbidity description. As specific codes for atrial fibrillation were only implemented in Scotland from April 2016 (ICD-10 version 2016), we included "atrial fibrillation and flutter" (ICD-10 code I48). No entry in ICD-10 was identified for: C46.71 (replaced with C46.7); M25.50, M25.51, M25.55, M25.57 (replaced with M25.5); K63.81 and K63.88 (replaced with K63.8), K92.80 and K92.88 (replaced with K92.8).

## Appendix 2. Characteristics of patients with missing CHI numbers, SIMD quintile or UR category

### Age-sex distribution of admissions with missing CHI numbers (adults with an inpatient stay 2014)

| Age          | Female     | Male       | Total      |
|--------------|------------|------------|------------|
| 18-20        | 8          | 17         | <b>25</b>  |
| 21-30        | 33         | 111        | <b>144</b> |
| 31-40        | 17         | 86         | <b>103</b> |
| 41-50        | 29         | 88         | <b>117</b> |
| 51-60        | 18         | 84         | <b>102</b> |
| 61-70        | 30         | 47         | <b>77</b>  |
| 71-80        | 33         | 29         | <b>62</b>  |
| ≥81          | 19         | 13         | <b>32</b>  |
| <b>Total</b> | <b>187</b> | <b>475</b> | <b>662</b> |

### Patients with missing SIMD quintile and Urban-Rural category

| Characteristic               | SIMD       |         | U-R        |         |
|------------------------------|------------|---------|------------|---------|
|                              | missing    |         | missing    |         |
|                              | n          | %       | n          | %       |
| <b>Total</b>                 | <b>314</b> |         | <b>576</b> |         |
| <b>Males, n (%)</b>          | 155        | (49.4)  | 258        | (44.8)  |
| <b>Age, median (IQR)</b>     | 47         | (31-62) | 43         | (29-60) |
| <b>Admission type, n (%)</b> |            |         |            |         |
| <b>Routine</b>               | 82         | (26.1)  | 156        | (27.1)  |
| <b>Emergency</b>             | 232        | (73.9)  | 420        | (72.9)  |

### Appendix 3. Prevalence of multimorbidity by age and urban-rural category

|                  | Total | ≥2 conditions |       |                |  |                |
|------------------|-------|---------------|-------|----------------|--|----------------|
|                  | n     | n             | %     | 95% CI         |  | p <sup>a</sup> |
| <b>18-29 yrs</b> |       |               |       |                |  |                |
| 1 (large urban)  | 2,164 | 115           | 5.31  | (4.4% -6.3%)   |  | 0.06           |
| 2                | 673   | 43            | 6.39  | (4.8% -8.5%)   |  |                |
| 3                | 306   | 26            | 8.50  | (5.8% -12.2%)  |  |                |
| 4                | 340   | 24            | 7.06  | (4.8% -10.3%)  |  |                |
| 5                | 697   | 48            | 6.89  | (5.2% -9.0%)   |  |                |
| 6 (remote rural) | 352   | 13            | 3.69  | (2.2% -6.3%)   |  |                |
| <b>30-44 yrs</b> |       |               |       |                |  |                |
| 1 (large urban)  | 2,467 | 300           | 12.16 | (10.9% -13.5%) |  | 0.03           |
| 2                | 873   | 105           | 12.03 | (10.0% -14.4%) |  |                |
| 3                | 466   | 45            | 9.66  | (7.3% -12.7%)  |  |                |
| 4                | 465   | 55            | 11.83 | (9.2% -15.1%)  |  |                |
| 5                | 968   | 94            | 9.71  | (8.0% -11.7%)  |  |                |
| 6 (remote rural) | 529   | 41            | 7.75  | (5.8% -10.4%)  |  |                |
| <b>45-59 yrs</b> |       |               |       |                |  |                |
| 1 (large urban)  | 3,168 | 699           | 22.06 | (20.7% -23.5%) |  | <0.001         |
| 2                | 1,270 | 240           | 18.90 | (16.8% -21.1%) |  |                |
| 3                | 707   | 123           | 17.40 | (14.8% -20.4%) |  |                |
| 4                | 709   | 124           | 17.49 | (14.9% -20.5%) |  |                |
| 5                | 1,670 | 305           | 18.26 | (16.5% -20.2%) |  |                |
| 6 (remote rural) | 1,029 | 135           | 13.12 | (11.2% -15.3%) |  |                |
| <b>60-74 yrs</b> |       |               |       |                |  |                |
| 1 (large urban)  | 3,722 | 1340          | 36.00 | (34.5% -37.6%) |  | <0.001         |
| 2                | 1,738 | 609           | 35.04 | (32.8% -37.3%) |  |                |
| 3                | 914   | 315           | 34.46 | (31.4% -37.6%) |  |                |
| 4                | 1,014 | 329           | 32.45 | (29.6% -35.4%) |  |                |
| 5                | 2,264 | 688           | 30.39 | (28.5% -32.3%) |  |                |
| 6 (remote rural) | 1,416 | 367           | 25.92 | (23.7% -28.3%) |  |                |
| <b>75-89 yrs</b> |       |               |       |                |  |                |
| 1 (large urban)  | 3,564 | 1,753         | 49.19 | (47.5% -50.8%) |  | <0.001         |
| 2                | 1,549 | 731           | 47.19 | (44.7% -49.7%) |  |                |
| 3                | 816   | 353           | 43.26 | (39.9% -46.7%) |  |                |
| 4                | 1,022 | 450           | 44.03 | (41.0% -47.1%) |  |                |
| 5                | 1,641 | 746           | 45.46 | (43.1% -47.9%) |  |                |
| 6 (remote rural) | 1,062 | 388           | 36.53 | (33.7% -39.5%) |  |                |
| <b>≥90 yrs</b>   |       |               |       |                |  |                |
| 1 (large urban)  | 492   | 281           | 57.11 | (52.7% -61.4%) |  | <0.001         |
| 2                | 226   | 113           | 50.00 | (43.5% -56.5%) |  |                |
| 3                | 120   | 63            | 52.50 | (43.5% -61.3%) |  |                |
| 4                | 169   | 70            | 41.42 | (34.2% -49.0%) |  |                |
| 5                | 244   | 115           | 47.13 | (40.9% -53.4%) |  |                |
| 6 (remote rural) | 143   | 55            | 38.46 | (30.8% -46.7%) |  |                |

CI, confidence intervals.

<sup>a</sup> p-value for  $\chi^2$  test for the association between multimorbidity status (<2 or ≥2 conditions) and urban-rural category.

#### Appendix 4. Prevalence of multimorbidity by age and SIMD category

|                    | Total | ≥2 conditions |        |        |         |                |
|--------------------|-------|---------------|--------|--------|---------|----------------|
|                    | n     | n             | %      | 95% CI |         | p <sup>a</sup> |
| <b>18-29 yrs</b>   |       |               |        |        |         |                |
| 1 (most deprived)  | 466   | 27            | (5.8)  | (4.0%  | -8.3%)  | 0.26           |
| 2                  | 825   | 60            | (7.3)  | (5.7%  | -9.3%)  |                |
| 3                  | 1,081 | 65            | (6.0)  | (4.7%  | -7.6%)  |                |
| 4                  | 1,060 | 65            | (6.1)  | (4.8%  | -7.7%)  |                |
| 5 (least deprived) | 1,178 | 57            | (4.8)  | (3.7%  | -6.2%)  |                |
| <b>30-44 yrs</b>   |       |               |        |        |         |                |
| 1 (most deprived)  | 690   | 94            | (13.6) | (11.3% | -16.4%) | 0.01           |
| 2                  | 972   | 124           | (12.8) | (10.8% | -15.0%) |                |
| 3                  | 1,326 | 147           | (11.1) | (9.5%  | -12.9%) |                |
| 4                  | 1,398 | 155           | (11.1) | (9.5%  | -12.8%) |                |
| 5 (least deprived) | 1,463 | 130           | (8.9)  | (7.5%  | -10.5%) |                |
| <b>45-59 yrs</b>   |       |               |        |        |         |                |
| 1 (most deprived)  | 779   | 214           | (27.5) | (24.4% | -30.7%) | <0.001         |
| 2                  | 1,334 | 297           | (22.3) | (20.1% | -24.6%) |                |
| 3                  | 1,981 | 391           | (19.7) | (18.0% | -21.5%) |                |
| 4                  | 2,287 | 392           | (17.1) | (15.7% | -18.7%) |                |
| 5 (least deprived) | 2,221 | 349           | (15.7) | (14.3% | -17.3%) |                |
| <b>60-74 yrs</b>   |       |               |        |        |         |                |
| 1 (most deprived)  | 771   | 295           | (38.3) | (34.9% | -41.7%) | <0.001         |
| 2                  | 1,545 | 554           | (35.9) | (33.5% | -38.3%) |                |
| 3                  | 2,751 | 945           | (34.4) | (32.6% | -36.1%) |                |
| 4                  | 3,045 | 929           | (30.5) | (28.9% | -32.2%) |                |
| 5 (least deprived) | 2,989 | 933           | (31.2) | (29.6% | -32.9%) |                |
| <b>75-89 yrs</b>   |       |               |        |        |         |                |
| 1 (most deprived)  | 557   | 284           | (51.0) | (46.8% | -55.1%) | <0.001         |
| 2                  | 1,411 | 711           | (50.4) | (47.8% | -53.0%) |                |
| 3                  | 2,409 | 1,122         | (46.6) | (44.6% | -48.6%) |                |
| 4                  | 2,584 | 1,135         | (43.9) | (42.0% | -45.8%) |                |
| 5 (least deprived) | 2,709 | 1,178         | (43.5) | (41.6% | -45.4%) |                |
| <b>≥90 yrs</b>     |       |               |        |        |         |                |
| 1 (most deprived)  | 54    | 39            | (72.2) | (58.8% | -82.6%) | 0.01           |
| 2                  | 192   | 90            | (46.9) | (39.9% | -54.0%) |                |
| 3                  | 338   | 169           | (50.0) | (44.7% | -55.3%) |                |
| 4                  | 418   | 197           | (47.1) | (42.4% | -51.9%) |                |
| 5 (least deprived) | 397   | 206           | (51.9) | (47.0% | -56.8%) |                |

CI, confidence intervals.

<sup>a</sup> p-value for  $\chi^2$  test for the association between multimorbidity status (<2 or ≥2 conditions) and SIMD quintiles.
